# Supplementary material for: Silver Complexes of Miconazole and Metronidazole: Potential Candidates for Melanoma Treatment
Source: MDPI journal article supplement (doi:10.3390/ijms25105081), 2024-05-07
Supplement: s1 [file s1]

# Silver Complexes of Miconazole and Metronidazole: Potential Candidates for Melanoma Treatment

Małgorzata Fabijańska <sup>1,\*</sup>, Agnieszka J. Rybarczyk-Pirek <sup>2</sup>, Justyna Dominikowska <sup>2</sup>, Karolina Stryjska <sup>1</sup>, Dominik Żyro <sup>1</sup>, Magdalena Markowicz-Piasecka <sup>3</sup>, Małgorzata Iwona Szynkowska-Jóźwik <sup>4</sup>, Justyn Ochocki <sup>5</sup> and Joanna Sikora <sup>1</sup>

<sup>1</sup> Department of Bioinorganic Chemistry, Medical University of Lodz, ul. Muszynskiego 1, 90-151 Lodz, Poland

<sup>2</sup> Theoretical and Structural Chemistry Group, Department of Physical Chemistry, Faculty of Chemistry, University of Lodz, Pomorska 163/165, 90-236 Łódź, Poland

<sup>3</sup> Department of Applied Pharmacy, Medical University of Lodz, ul. Muszynskiego 1, 90-151 Lodz, Poland

<sup>4</sup> Faculty of Chemistry, Institute of General and Ecological Chemistry, Lodz University of Technology, Zeromskiego 116, 90-543 Lodz, Poland

<sup>5</sup> Faculty of Pharmacy, Chair of Medicinal Chemistry, Group of Bioinorganic Chemistry Medical University of Lodz, 1 Muszynskiego Str., 90-151 Lodz, Poland (Professor Emeritus of Pharmacy)

\* Correspondence: e-mail: malgorzata.fabijanska@umed.lodz.pl; Tel.: +48426779222

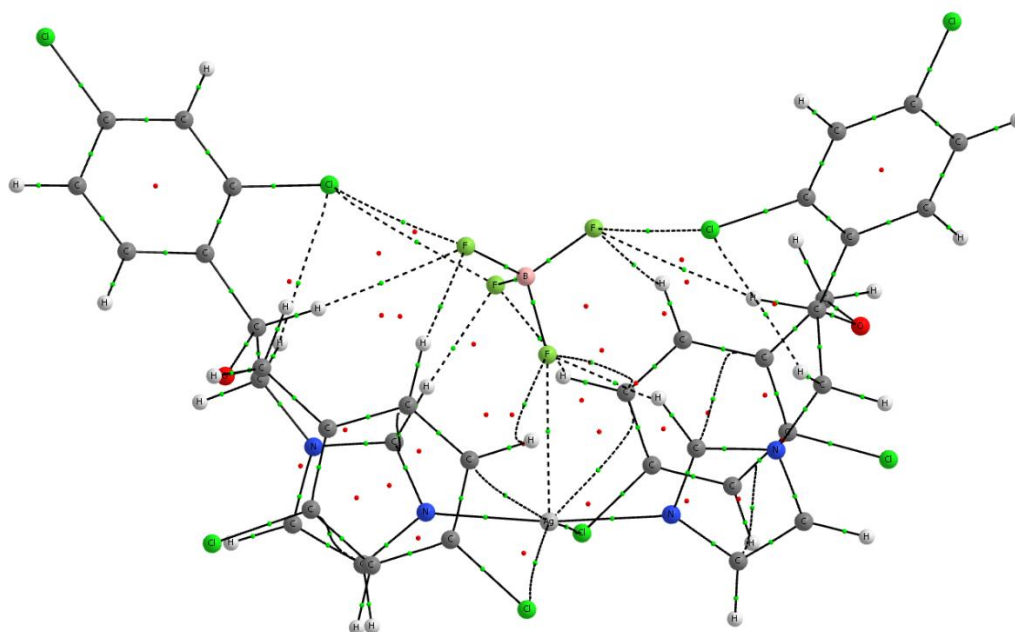

Figure S1. Molecular graph of Ag(MCZ)<sub>2</sub>BF<sub>4</sub>; green dots – bond critical points, red dots – ring critical points, cage critical points are omitted for picture clarity.

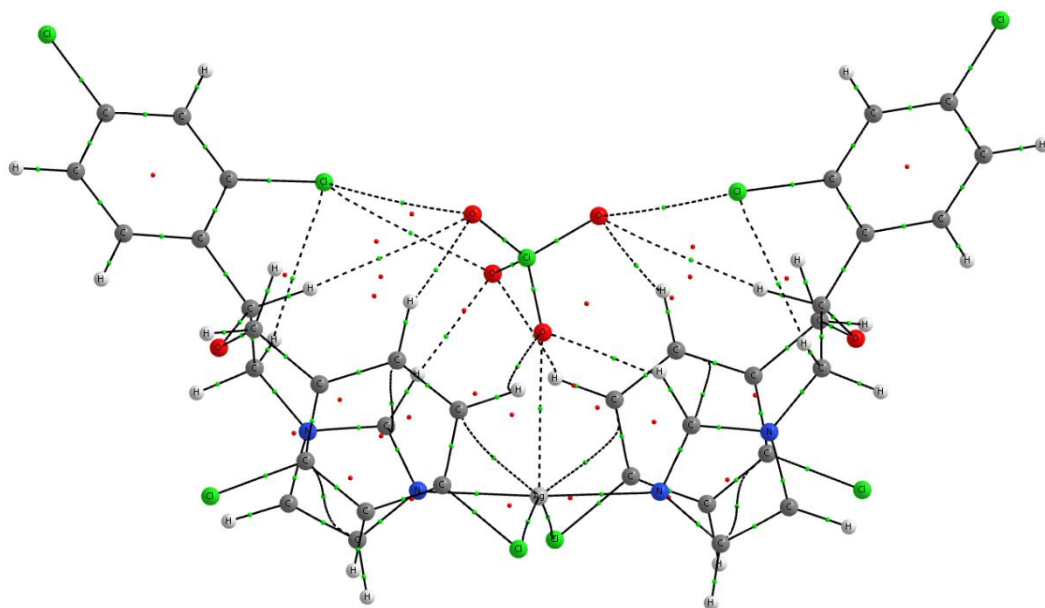

Figure S2. Molecular graph of  $\text{Ag}(\text{MCZ})_2\text{ClO}_4$ ; green dots – bond critical points, red dots – ring critical points, cage critical points are omitted for picture clarity.

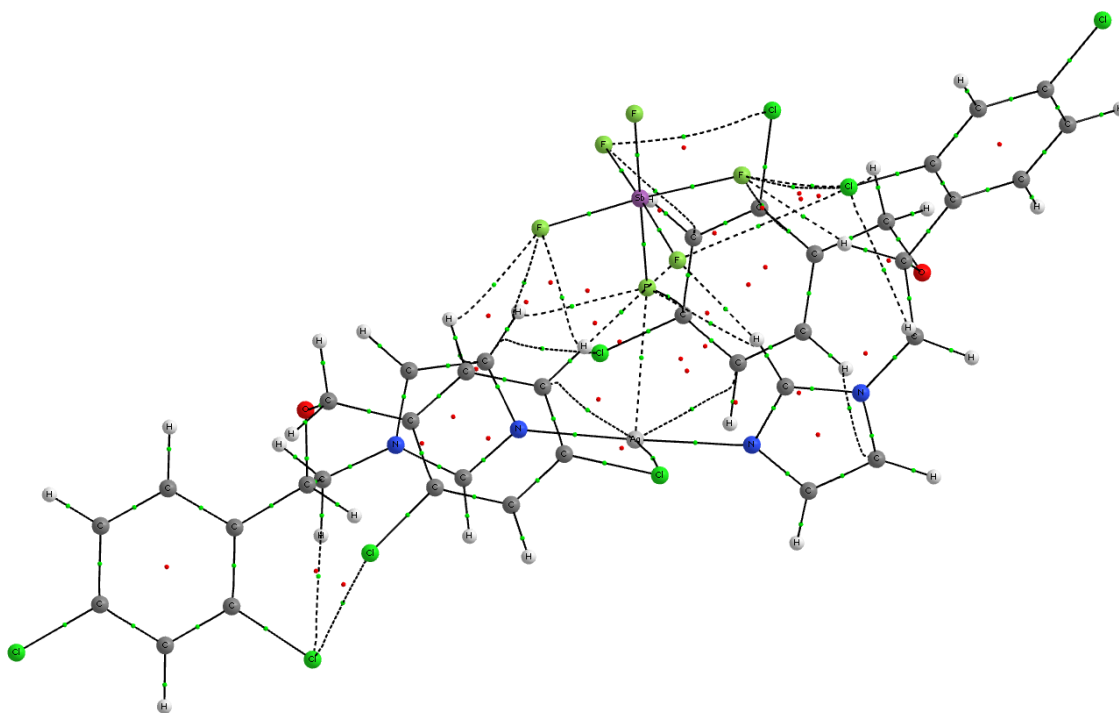

Figure S3. Molecular graph of  $\text{Ag}(\text{MCZ})_2\text{SbF}_6$ ; green dots – bond critical points, red dots – ring critical points, cage critical points are omitted for picture clarity.

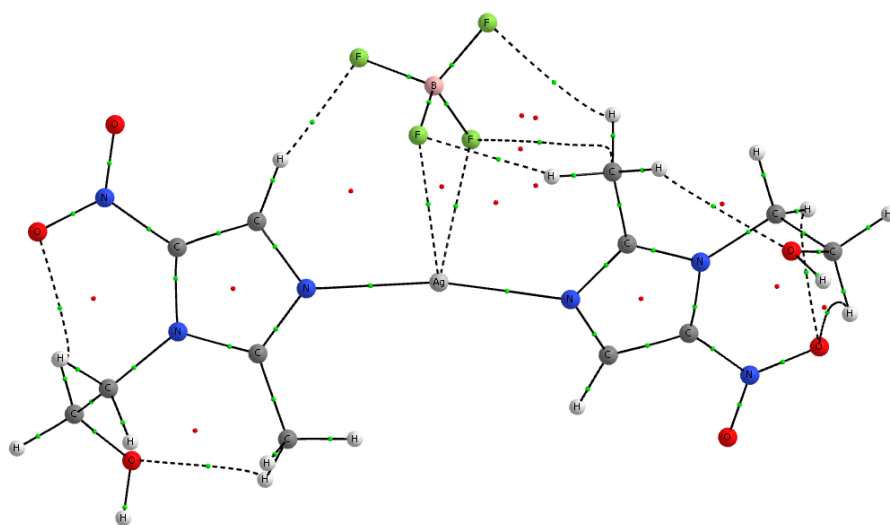

Figure S4. Molecular graph of Ag(MTZ)<sub>2</sub>BF<sub>4</sub>; green dots – bond critical points, red dots – ring critical points, cage critical points are omitted for picture clarity.

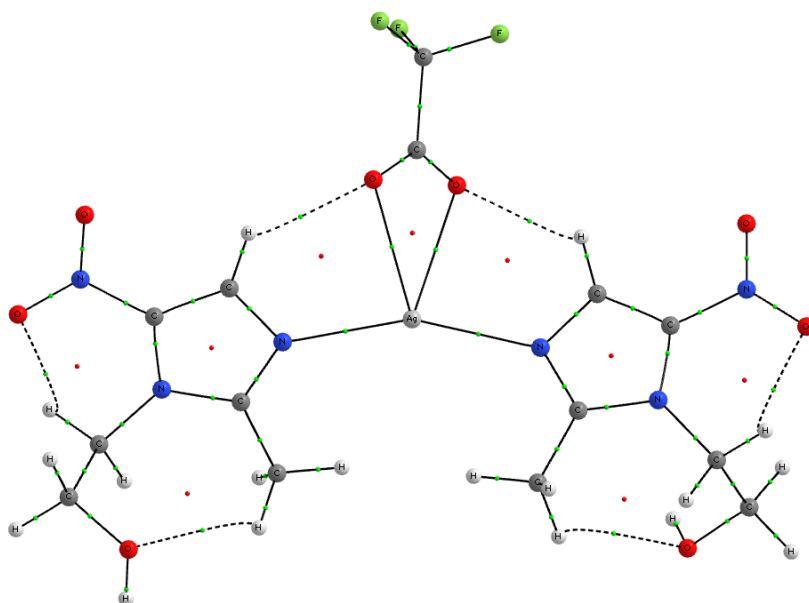

Figure S5. Molecular graph of Ag(MTZ)<sub>2</sub>CF<sub>3</sub>CO<sub>2</sub>; green dots – bond critical points, red dots – ring critical points, cage critical points are omitted for picture clarity.

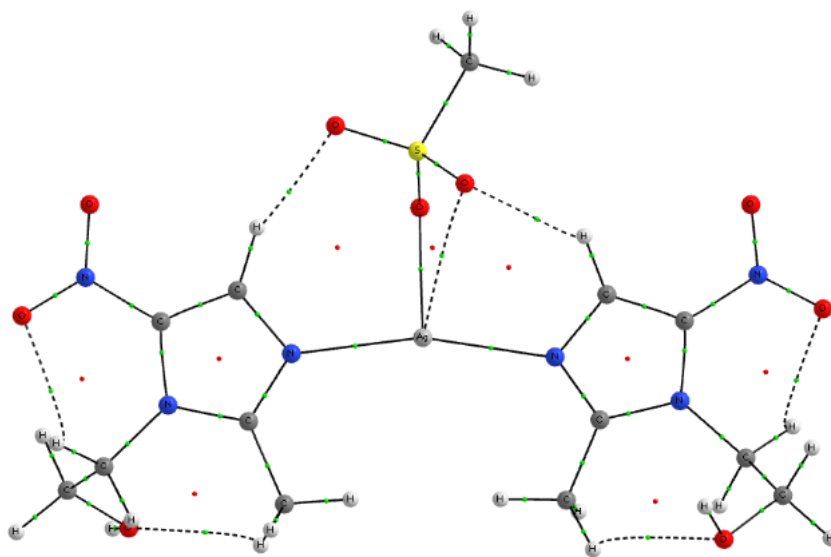

Figure S6. Molecular graph of  $\text{Ag}(\text{MTZ})_2\text{CH}_3\text{SO}_3$ ; green dots – bond critical points, red dots – ring critical points, cage critical points are omitted for picture clarity.

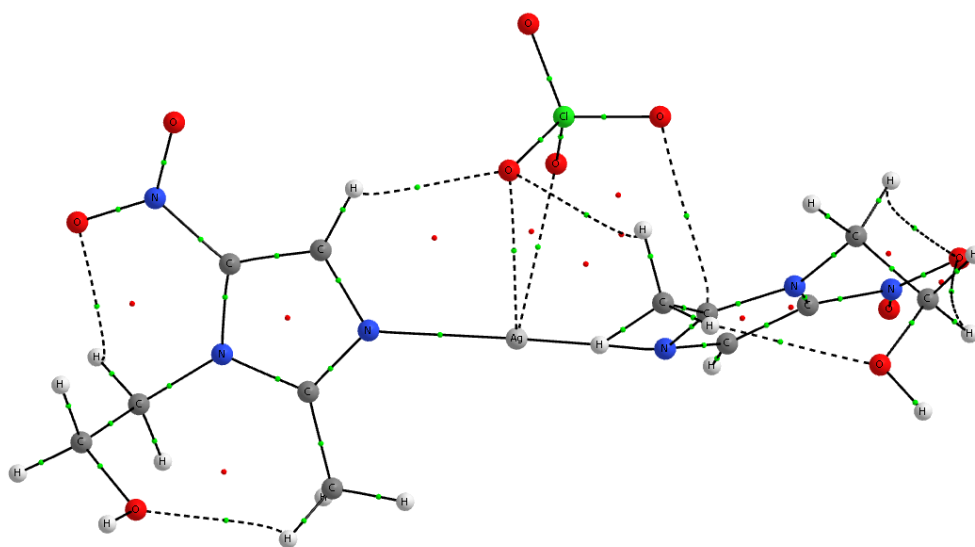

Figure S7. Molecular graph of  $\text{Ag}(\text{MTZ})_2\text{ClO}_4$ ; green dots – bond critical points, red dots – ring critical points, cage critical points are omitted for picture clarity.

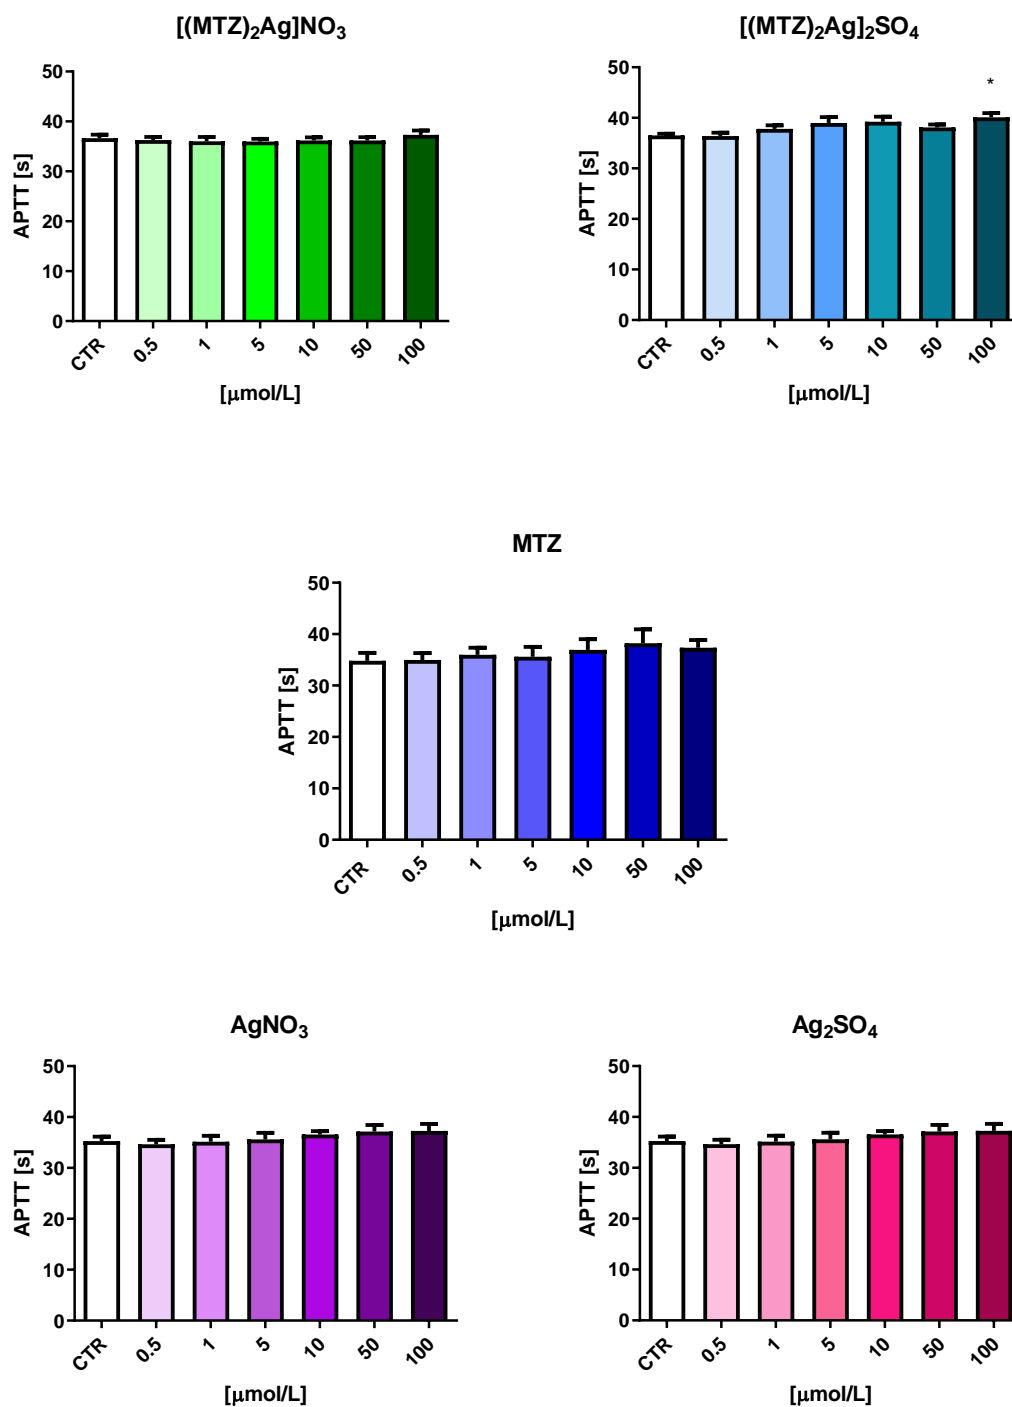

Figure S8. The influence of the tested silver(I) metronidazole complexes ( $[(\text{MTZ})_2\text{Ag}]\text{NO}_3$  and  $[(\text{MTZ})_2\text{Ag}]_2\text{SO}_4$ ) and ligands (MTZ - metronidazole;  $\text{AgNO}_3$ ;  $\text{Ag}_2\text{SO}_4$ ) on activated partial thromboplastin time (reference range: 26.7-40.0 s). The results are presented as mean  $\pm$  standard deviation ( $n = 5$ ); \*  $p < 0.05$  there is a statistically significant difference compared to the control sample (CTR).

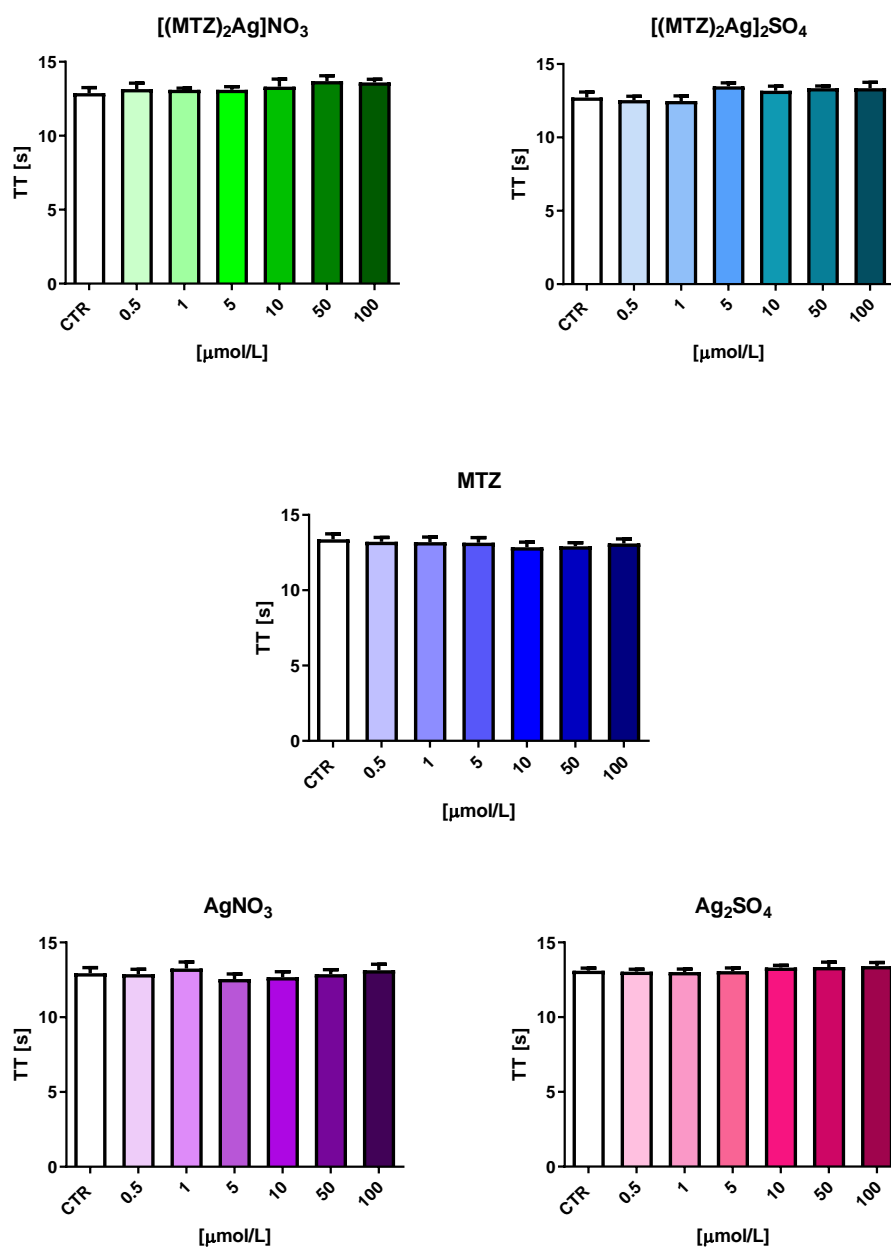

Figure S9. The influence of the tested silver(I) metronidazole complexes ( $[(\text{MTZ})_2\text{Ag}]\text{NO}_3$  and  $[(\text{MTZ})_2\text{Ag}]_2\text{SO}_4$ ) and ligands (MTZ - metronidazole;  $\text{AgNO}_3$ ;  $\text{Ag}_2\text{SO}_4$ ) on thrombin time". (reference range: 14.0-18.0 s). The results are presented as mean  $\pm$  standard deviation (n = 5); control sample (CTR).

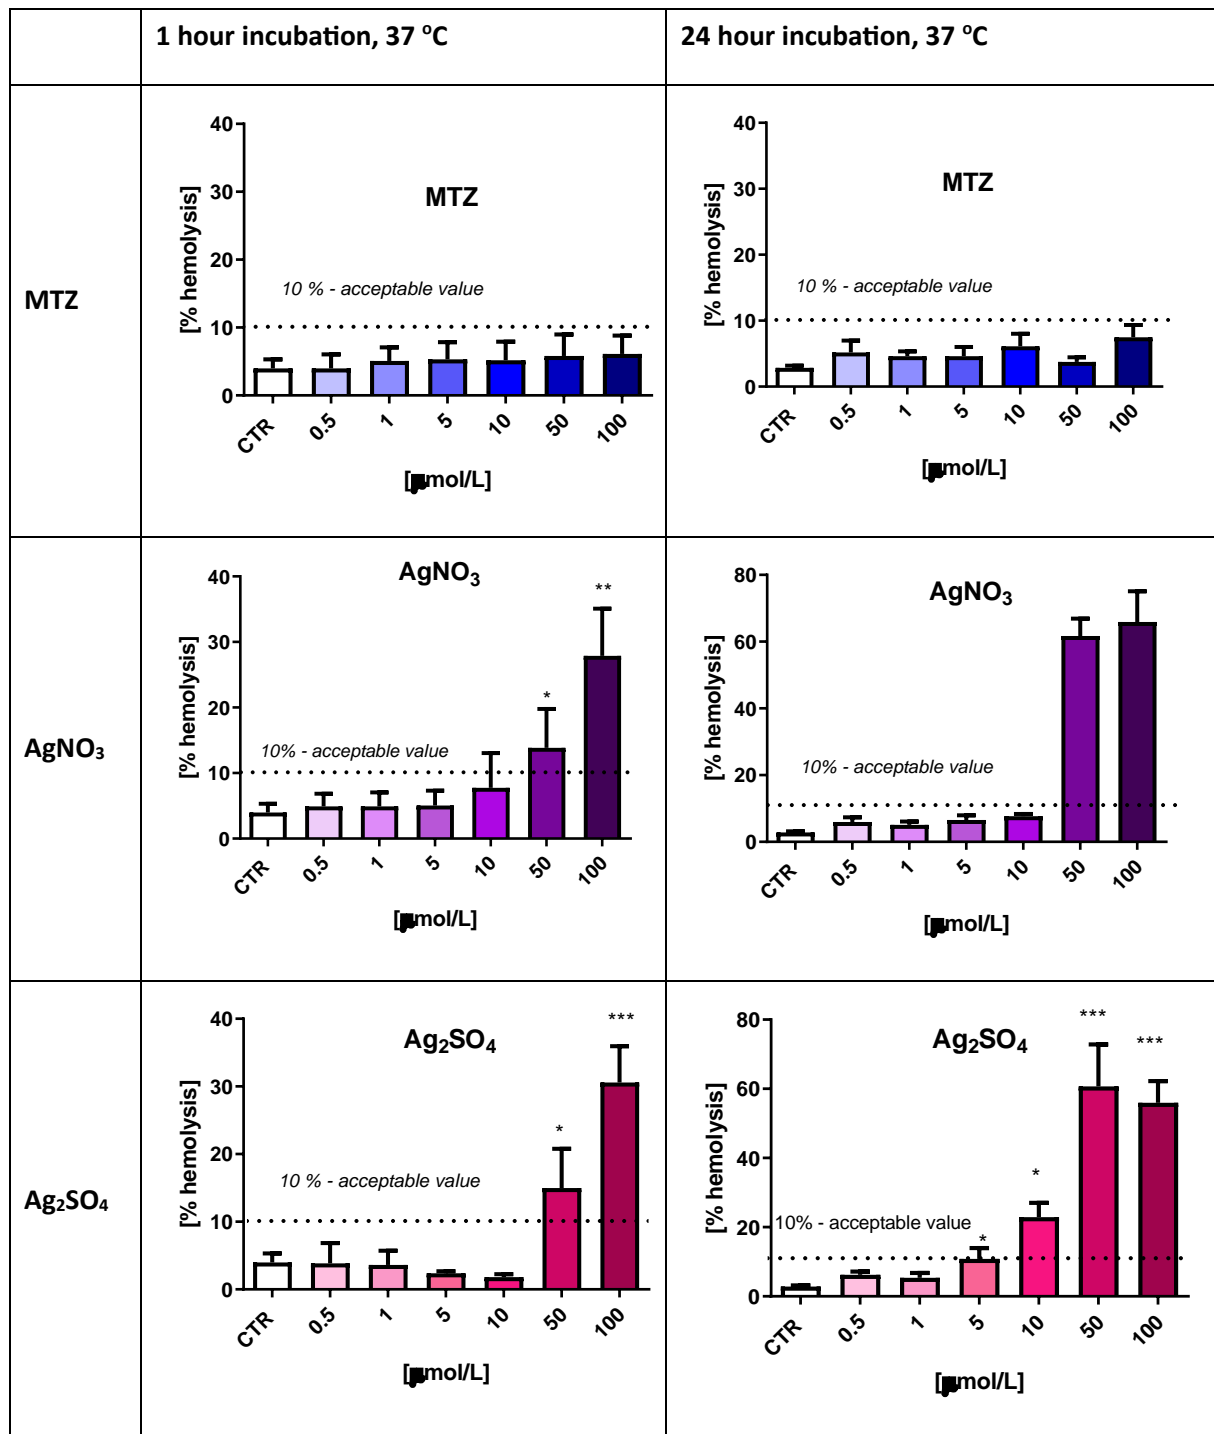

Figure S10. The effects of incubation 2 % RBC suspension with ligands (MTZ - metronidazole; AgNO<sub>3</sub>; Ag<sub>2</sub>SO<sub>4</sub>) on RBC hemolysis (acceptable value of hemolysis proving the biocompatibility of the compound is 10%). The results are presented as mean ± standard deviation (n = 35); \* p < 0.05, \*\* p < 0.01, \*\*\* p < 0.001 there is a statistically significant difference compared to the control sample (CTR).
